# Supplementary material for: Spectroscopic Analyses and Antimicrobial Activity of Novel Ciprofloxacin and 7-Hydroxy-4-methylcoumarin, the Plant-Based Natural Benzopyrone Derivative
Source: MDPI journal article supplement (doi:10.3390/ijms23148019), 2022-07-20
Supplement: s1 [file s1]

# Spectroscopic Analyses and Antimicrobial Activity of Novel Ciprofloxacin and 7-Hydroxy-4-methylcoumarin, the Plant-Based Natural Benzopyrone Derivative

Mohamed S. El-Attar <sup>1</sup>, Sadeek A. Sadeek <sup>1</sup>, Sherif M. Abd El-Hamid <sup>2</sup> and Hazem S. Elshafie <sup>3,\*</sup>

<sup>1</sup> Department of Chemistry, Faculty of Science, Zagazig University, Zagazig 44519, Egypt; mselattar@zu.edu.eg (M.S.E.-A.); s\_sadeek@zu.edu.eg (S.A.S.)

<sup>2</sup> Department of Basic Science, Higher Future Institute of Engineering and Technology, Mansoura 35511, Egypt; sherifmohamed226@gmail.com

<sup>3</sup> School of Agricultural, Forestry, Food and Environmental Sciences, University of Basilicata, 85100 Potenza, Italy

\* Correspondence: hazem.elshafie@unibas.it; Tel.: +39-0971-205522; Fax: +39-0971-205503

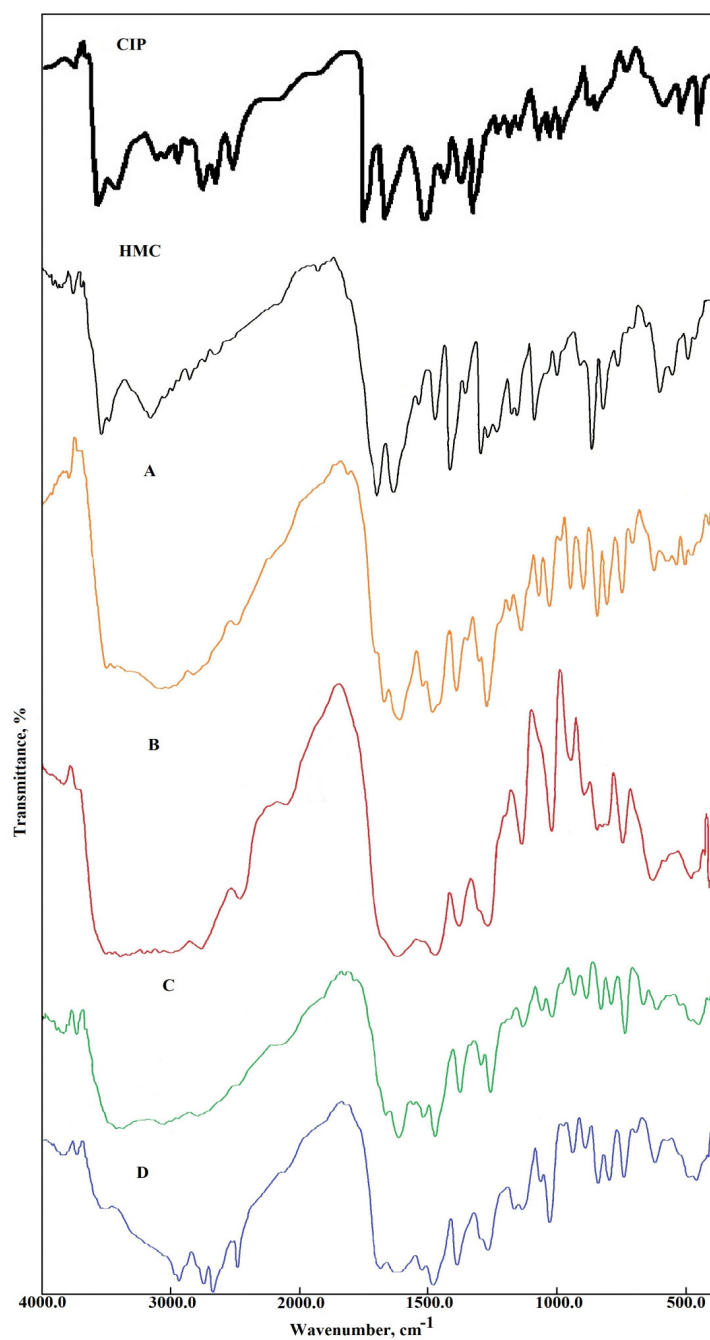

**Figure S1.** Infrared spectra for CIP, HMC and their Zr(IV) complexes (A) [ZrO(CIP)(HMC)(H<sub>2</sub>O)Cl]Cl<sub>2</sub>·5H<sub>2</sub>O, (B) [ZrO(CIP)(HMC)(DMF)(H<sub>2</sub>O)]Cl<sub>2</sub>·10H<sub>2</sub>O, (C) [ZrO(CIP)(HMC)(Py)(H<sub>2</sub>O)]Cl<sub>2</sub>·10H<sub>2</sub>O and (D) [ZrO(CIP)(HMC)(Et<sub>3</sub>N)(H<sub>2</sub>O)]Cl<sub>2</sub>·3H<sub>2</sub>O.

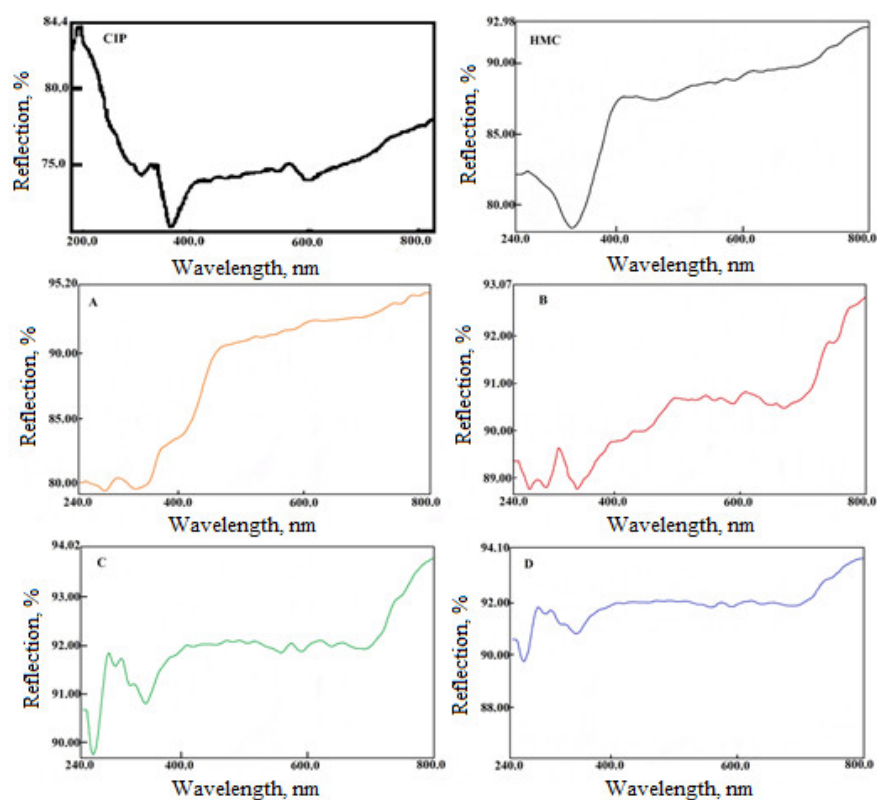

**Figure S2.** UV-Vis spectra for CIP, HMC and their Zr(IV) complexes (A)  $[\text{ZrO}(\text{CIP})(\text{HMC})(\text{H}_2\text{O})\text{Cl}]\text{Cl} \cdot 1.5\text{H}_2\text{O}$ , (B)  $[\text{ZrO}(\text{CIP})(\text{HMC})(\text{DMF})(\text{H}_2\text{O})]\text{Cl}_2 \cdot 10\text{H}_2\text{O}$ , (C)  $[\text{ZrO}(\text{CIP})(\text{HMC})(\text{Py})(\text{H}_2\text{O})]\text{Cl}_2 \cdot 10\text{H}_2\text{O}$  and (D)  $[\text{ZrO}(\text{CIP})(\text{HMC})(\text{Et}_3\text{N})(\text{H}_2\text{O})]\text{Cl}_2 \cdot 3\text{H}_2\text{O}$ .

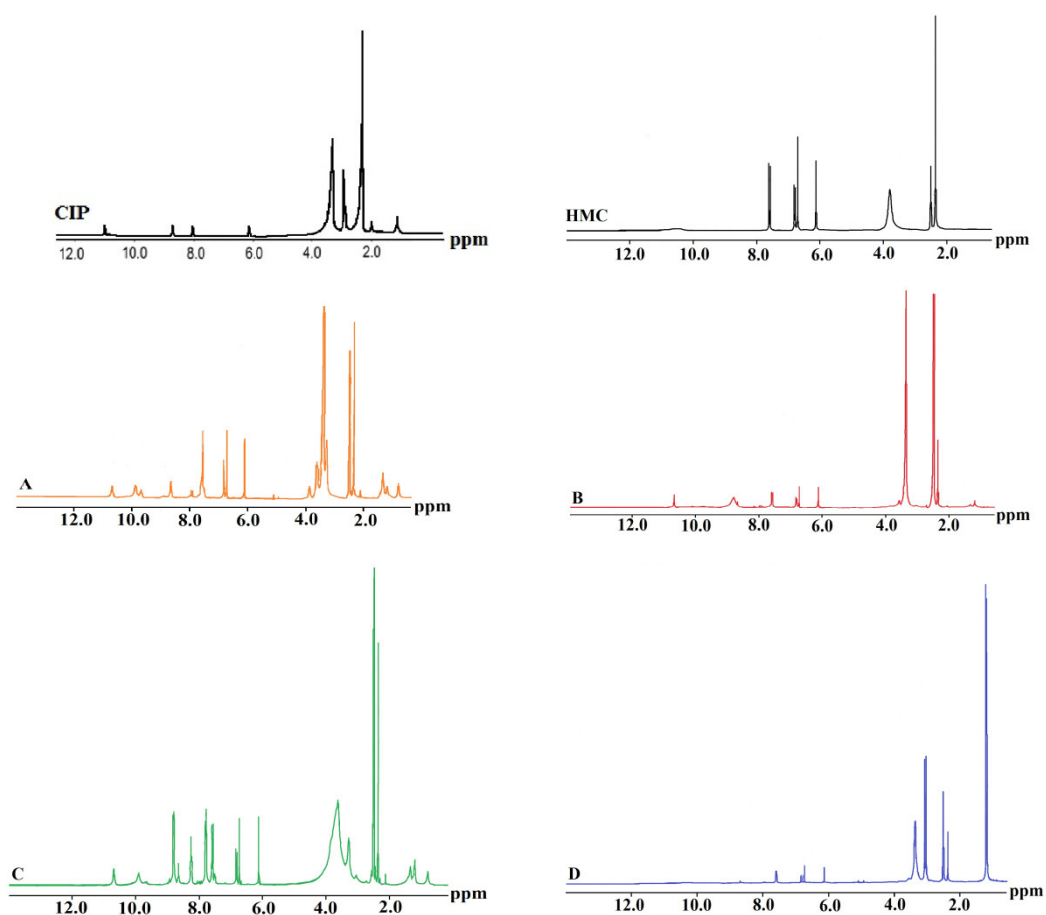

**Figure S3.**  $^1\text{H}$  NMR spectra for CIP, HMC and their Zr(IV) complexes **(A)**  $[\text{ZrO}(\text{CIP})(\text{HMC})(\text{H}_2\text{O})\text{Cl}]\text{Cl}\cdot 5\text{H}_2\text{O}$ , **(B)**  $[\text{ZrO}(\text{CIP})(\text{HMC})(\text{DMF})(\text{H}_2\text{O})]\text{Cl}_2\cdot 10\text{H}_2\text{O}$ , **(C)**  $[\text{ZrO}(\text{CIP})(\text{HMC})(\text{Py})(\text{H}_2\text{O})]\text{Cl}_2\cdot 10\text{H}_2\text{O}$  and **(D)**  $[\text{ZrO}(\text{CIP})(\text{HMC})(\text{Et}_3\text{N})(\text{H}_2\text{O})]\text{Cl}_2\cdot 3\text{H}_2\text{O}$ .

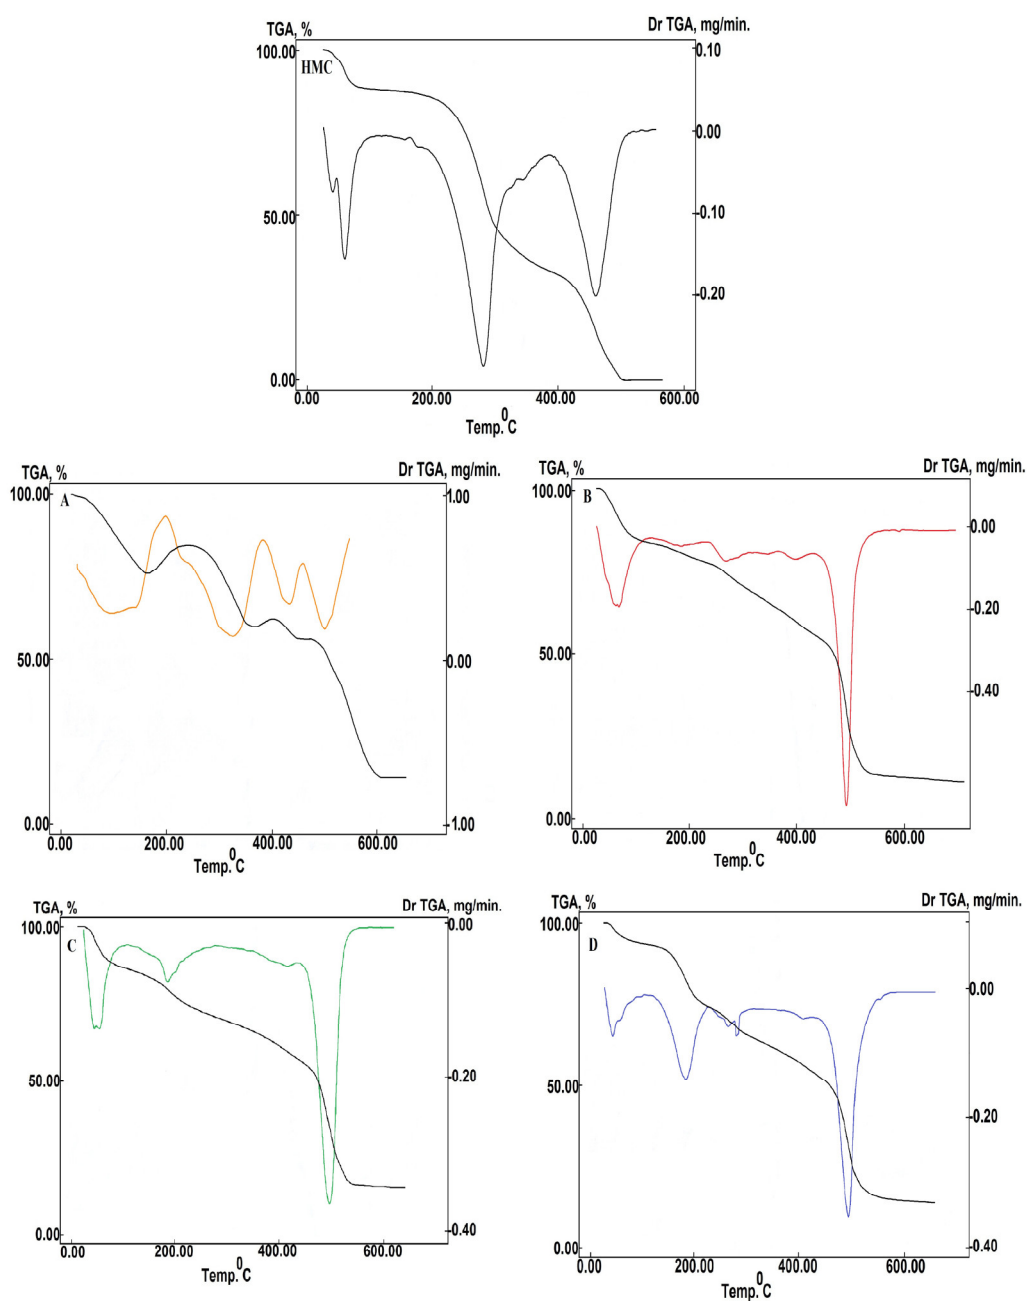

**Figure S4.** TG and DTG diagrams for CIP, HMC and their Zr(IV) complexes **(A)**  $[\text{ZrO}(\text{CIP})(\text{HMC})(\text{H}_2\text{O})\text{Cl}]\text{Cl}\cdot 5\text{H}_2\text{O}$ , **(B)**  $[\text{ZrO}(\text{CIP})(\text{HMC})(\text{DMF})(\text{H}_2\text{O})]\text{Cl}_2\cdot 10\text{H}_2\text{O}$ , **(C)**  $[\text{ZrO}(\text{CIP})(\text{HMC})(\text{Py})(\text{H}_2\text{O})]\text{Cl}_2\cdot 10\text{H}_2\text{O}$  and **(D)**  $[\text{ZrO}(\text{CIP})(\text{HMC})(\text{Et}_3\text{N})(\text{H}_2\text{O})]\text{Cl}_2\cdot 3\text{H}_2\text{O}$ .

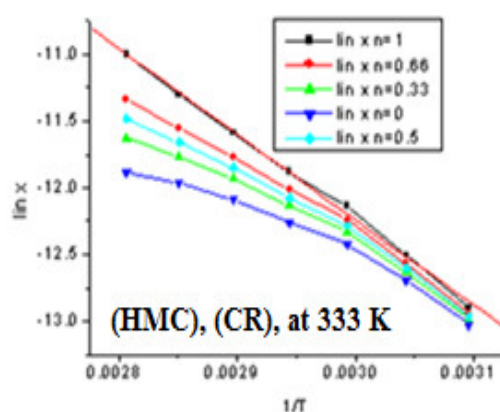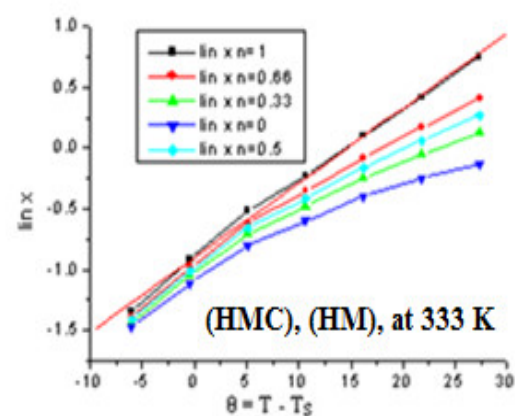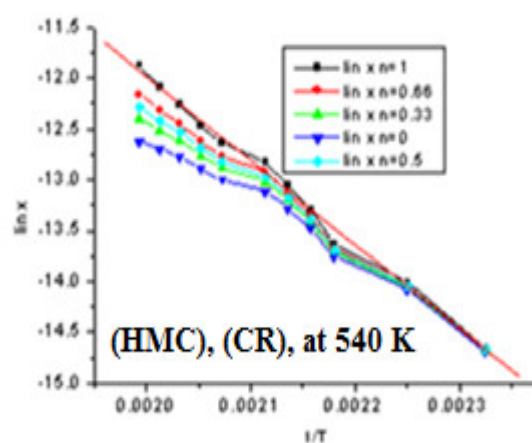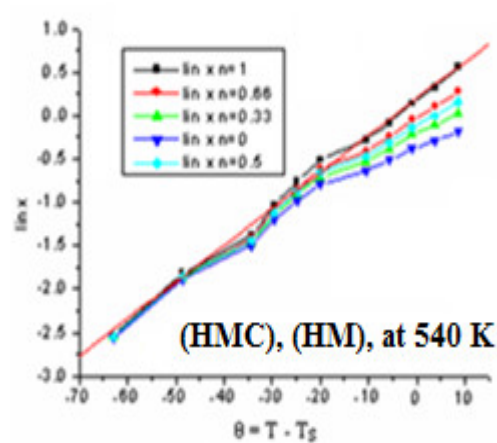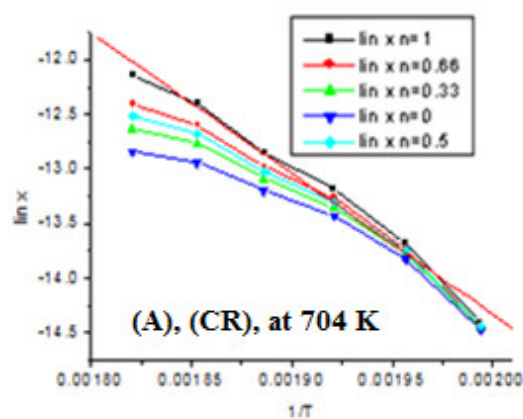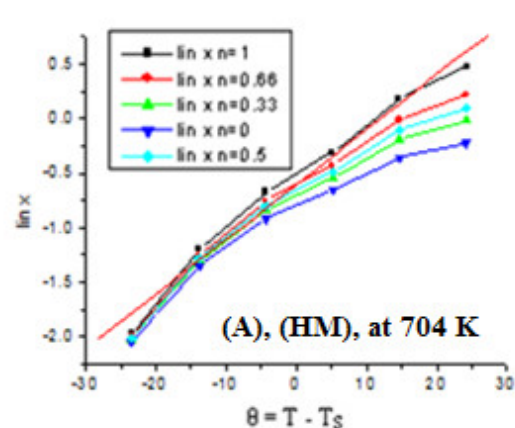

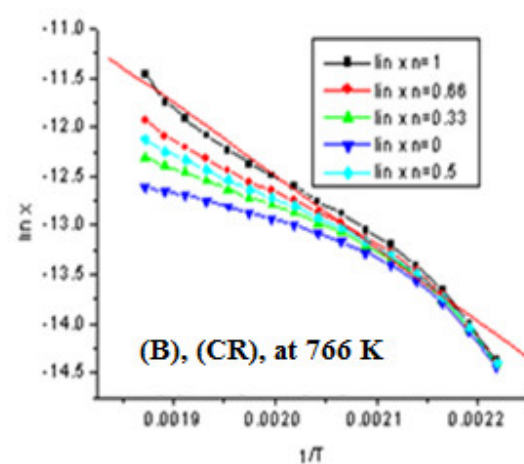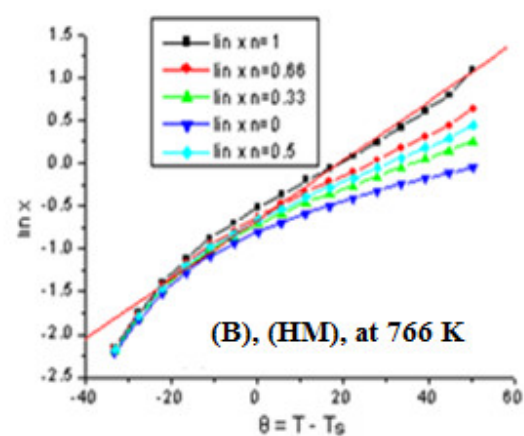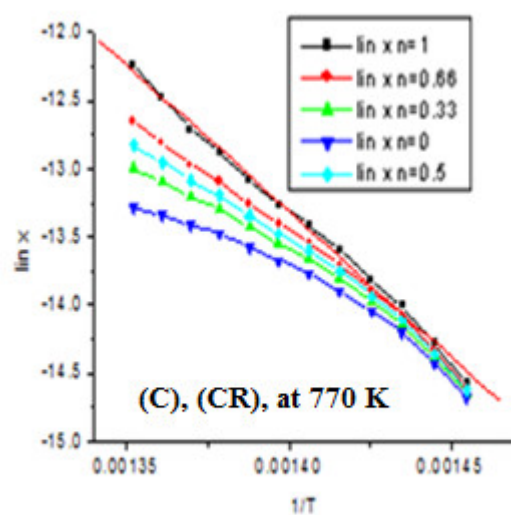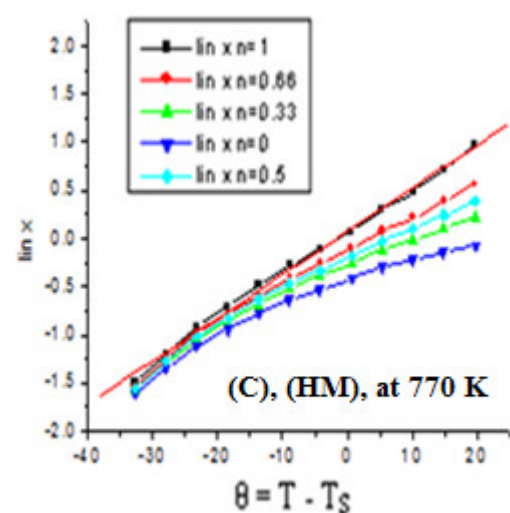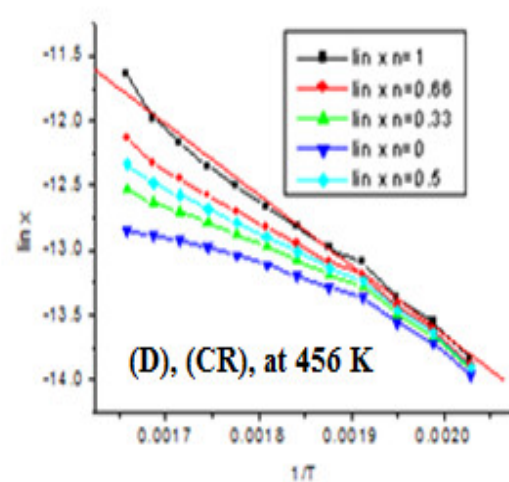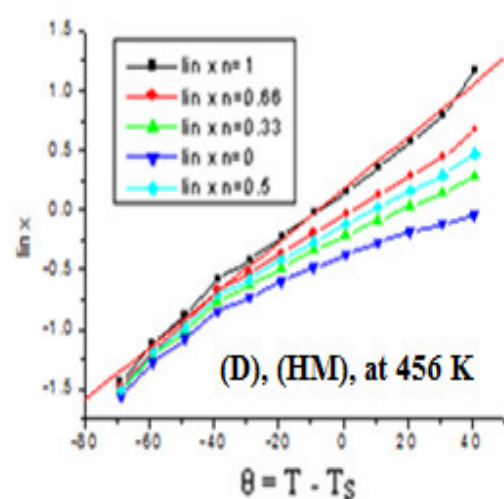

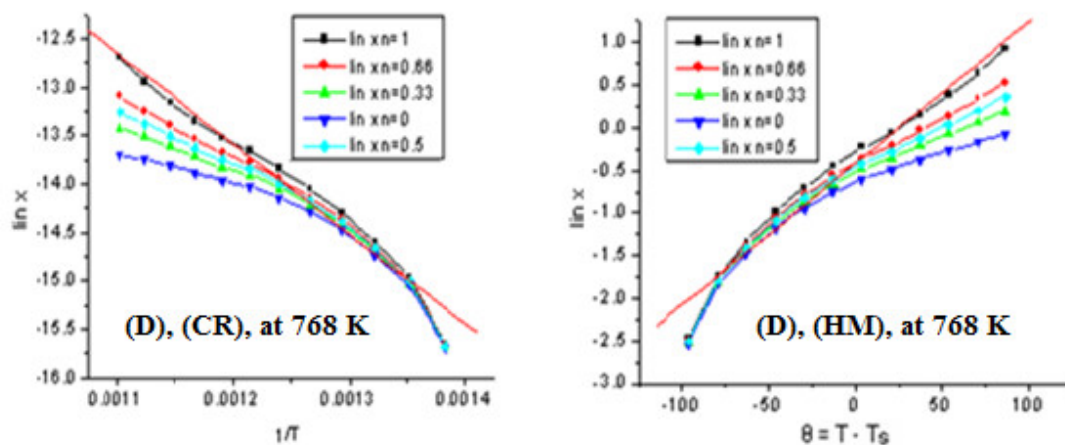

**Figure S5.** The diagrams of kinetic parameters for CIP, HMC and their Zr(IV) (A)  $[\text{ZrO}(\text{CIP})(\text{HMC})(\text{H}_2\text{O})\text{Cl}]\text{Cl}_2 \cdot 5\text{H}_2\text{O}$ , (B)  $[\text{ZrO}(\text{CIP})(\text{HMC})(\text{DMF})(\text{H}_2\text{O})]\text{Cl}_2 \cdot 10\text{H}_2\text{O}$ , (C)  $[\text{ZrO}(\text{CIP})(\text{HMC})(\text{Py})(\text{H}_2\text{O})]\text{Cl}_2 \cdot 10\text{H}_2\text{O}$  and (D)  $[\text{ZrO}(\text{CIP})(\text{HMC})(\text{Et}_3\text{N})(\text{H}_2\text{O})]\text{Cl}_2 \cdot 3\text{H}_2\text{O}$ .



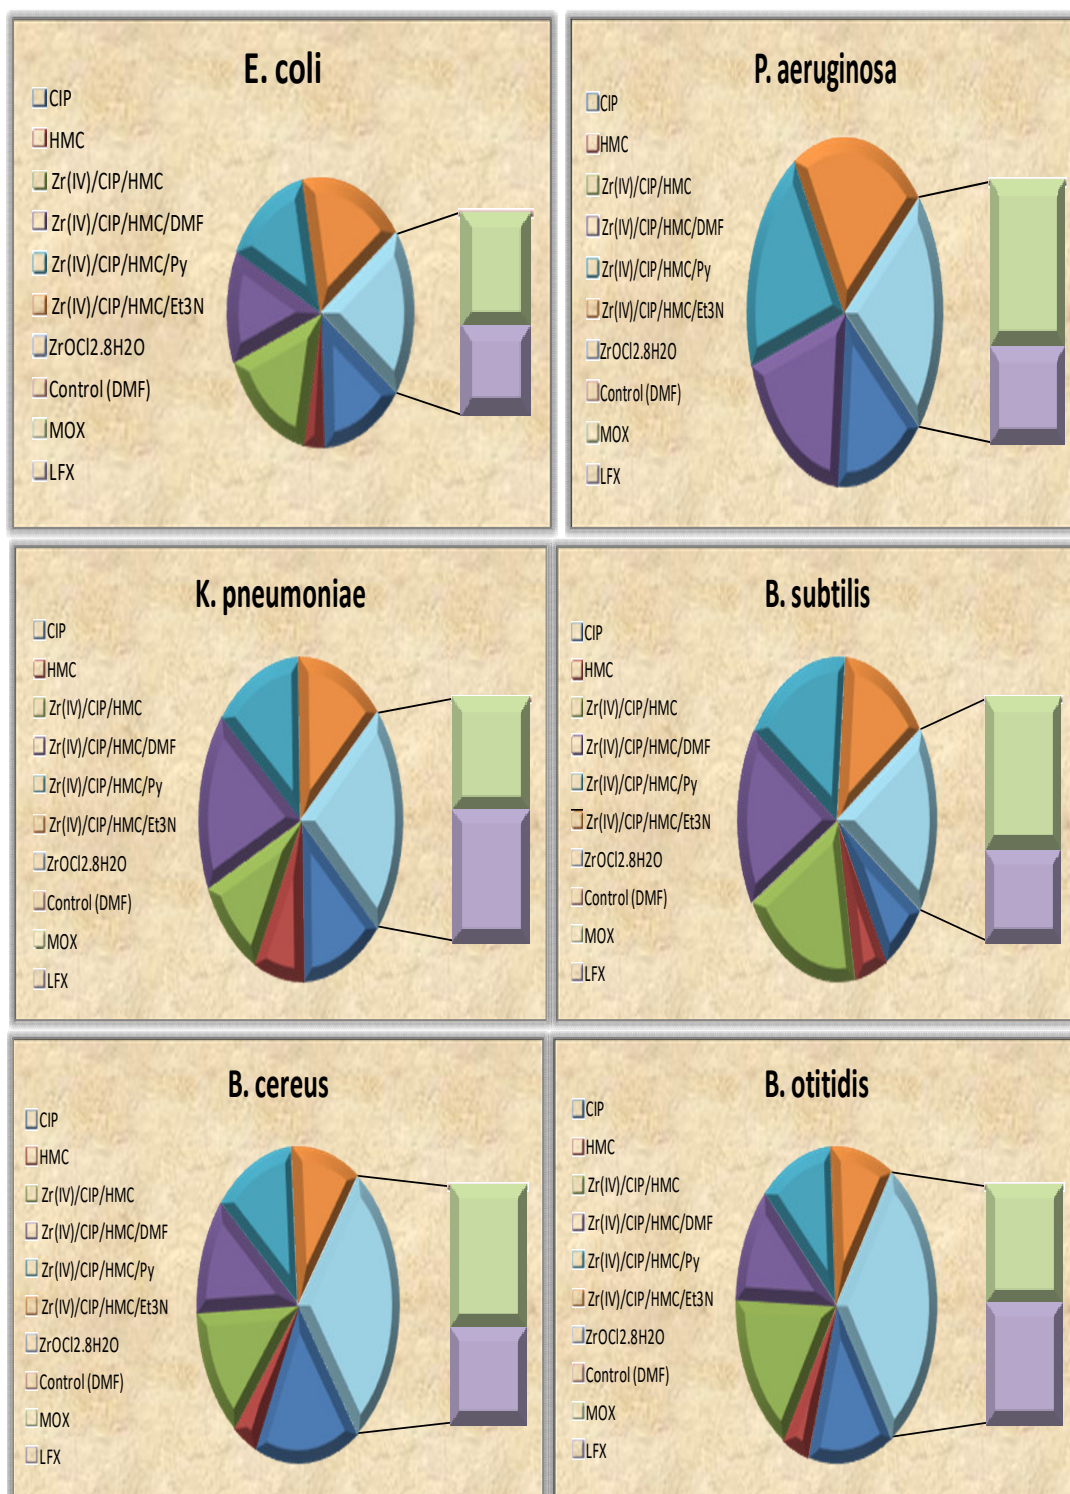

**Figure S6.** Antimicrobial activity of CIP, HMC and their Zr(IV) complexes.
